# Supplementary material
Source: PubMed Central journal article supplement (PMC10528677)
Supplement: NIHMS1919861-supplement-2.pdf [file NIHMS1919861-supplement-2.pdf]

## SUPPLEMENTAL INFORMATION

**Figure S1. HFD pair-feeding does not impact glucose or food intake but deficiency of microglial inflammatory signaling tends to increase gluconeogenesis, related to Figure 2.** (A)

Blood glucose and (B) food intake in IKK $\beta$ -MGKO mice fed *ad libitum* (IKK $\beta$ -MGKO AL) vs. pair-fed control (Ctl PF). Measurements were obtained 4 hours into the dark cycle. N = 7/group.

(C) Pyruvate tolerance test (2 g/kg pyruvate, i.p.) and (D) total glucose AUC at 11 weeks HFD in IKK $\beta$ -MGKO mice fed *ad libitum* vs. pair-fed control.

**Figure S2. Validation of TNF antibody (abcam, ab1793), related to Figure 4.** Representative images of hypothalamic sections showing Iba1 (green) and TNF (red) staining in wild-type (top) and TNF KO (bottom) mice treated with LPS (5 mg/kg) for 6 hours. Scale bars = 20  $\mu$ m.

**Figure S3. Pharmacological inhibition of microglia worsens insulin resistance during DIO in rats, related to Figure 5.** Male Wistar rats (N = 5/group) were fed HFD for 4 weeks and treated with minocycline (10  $\mu$ g, i.c.v.) or saline vehicle administered 3 times over 2d. (A) Plasma insulin levels at t = 0 of ITT. (B) ITT (1.5 U/kg insulin, i.p.) performed 1h after the third dose of minocycline or vehicle. (C) Total glucose AOC for the ITT. Values are mean  $\pm$  SEM. 2-way ANOVA with Bonferroni post-hoc test and Student's *t*-test, \* p < 0.05, \*\* p < 0.01.

**Figure S4. Chemogenetic microglial activation in hM3D mice is associated with increased pro-inflammatory signaling, related to Figure 5, Figure 6, and Figure 7.** Cx3cr1<sup>CreER/+</sup>::LSL-HA-hM3Dq-citrine (hM3D) mice were generated as an inducible model of *in vivo* microglial activation. (A) Representative hypothalamic sections immunostained for the microglial marker

(Iba1, green) and hM3D DREADD receptor (anti-HA tag, red) in tamoxifen-treated control and hM3D mice. Scale bars = 100  $\mu$ m. (B) Quantification of hM3D transgene expression by qRT-PCR in CNS and peripheral tissues in hM3D mice normalized to control (Cx3cr1<sup>CreER/+</sup>) levels. N = 3-4/group. Student's *t*-test, \*\*  $p < 0.01$ . (C) Fura Red was used to detect changes in intracellular calcium. Isolated hM3D primary microglia were treated with CNO (0.01  $\mu$ M or 0.1  $\mu$ M) or saline control over 150 minutes. Fura Red fluorescence of the microglial cells was measured using a plate reader and plotted normalized to 0 minute baseline. Mean traces shown for clarity. (D) 30 minute AUC bins of data in C. N = 6-7 replicates/treatment. Two-way ANOVA with Bonferroni post-hoc test, \*  $p < 0.05$ , \*\*  $p < 0.01$ , \*\*\*  $p < 0.001$ , \*\*\*\*  $p < 0.0001$ . (E) Representative hypothalamic sections from hM3D mice immunostained for the microglial marker (Iba1, green), hM3D DREADD receptor (anti-HA tag, red), and DAPI nuclear stain in hM3D mice given CNO (1 mg/kg, i.p.) or saline and perfused 1 hour later. Scale bars = 100  $\mu$ m. (F-G) Quantification of Iba1<sup>+</sup> microglia by (F) total number and (G) cellular size after CNO treatment. N = 6-12/group. Student's *t*-test, \*\* $p < 0.01$ . (H) Cytokine expression in FACS-isolated microglia from hM3D normalized to control levels in mice treated with CNO (1 mg/kg, i.p.). N = 6-7/genotype. Student's *t*-test, \*  $p < 0.05$ , \*\*  $p < 0.01$ , \*\*\*  $p < 0.001$ . All values are mean  $\pm$  SEM.

**Figure S5. Acute CNO-mediated activation of microglial hM3D does not induce sickness behavior, related to Figure 5.** (A) Dark cycle ambulatory activity was measured after saline or CNO injection (1 mg/kg, i.p.) in hM3D mice. Pretreatment line represents average of both groups of hM3D mice before injection (indicated by arrow). Dashed lines represent  $\pm$  SEM. (B) 30 min AUC bins of activity for 240 min after injection. N = 13-19/group. (C) Food intake and

(D) body weight were measured 24 hours after saline or CNO injection (0.3mg/kg or 1mg/kg, i.p.) using a within subjects crossover design. N = 14/group.

**Figure S6. Subthreshold peripheral CNO administration does not improve glucose tolerance in hM3D mice, related to Figure 5.** (A) GTT (2 g/kg glucose, i.p.) and (B) AUC in CD-fed hM3D and Ctl mice administered systemic CNO at the same dose used for i.c.v. experiments (1 µg, i.p., 2 hours prior). N = 8/group. All values are mean ± SEM.

**Figure S7. Chemogenetic activation of microglia in a Tmem119 Cre-based DREADD model improves glucose tolerance, related to Figure 5.** (A-D) GTT and AUC of CD-fed Tmem-Gq mice and littermate controls treated with (A-B) saline or (C-D) systemic CNO (10 mg/kg, i.p. 2 hr prior; 2 g/kg glucose, i.p.). N = 8-9/group. Student's *t*-test, \*\*\*  $p < 0.001$ .

**Figure S8. Chemogenetic activation of microglia improves glucose tolerance independently of central IL-6, IL-1, or CCR5 signaling and increases POMC neuron glucose sensing, related to Figure 6.** (A-F) CD-fed control and hM3D mice were injected with CNO (1 mg/kg, i.p.) and i.c.v. treatment listed below (indicated in figures by arrow labeled i.c.v.) 2 hours prior to all GTTs (2 g/kg glucose, i.p.). (A) GTT and (B) AUCs of mice administered IL-6ab (150 ng, i.c.v.) or vehicle. (C) GTT and (D) AUC of mice administered IL-1RA (100 ng, i.c.v.) or vehicle. (E) GTT and (F) AUC of mice administered CCR5 antagonist maraviroc (CCR5ant) (500 ng, i.c.v.) or vehicle. Two-way ANOVA with Šidák correction for multiple comparisons. (G) Representative images from the ARC of control and hM3D mice 2 hours after CNO (5 mg/kg, i.p.) and 1 hour after saline or glucose (2 g/kg, i.p.) stained for β-endorphin (green) and c-Fos (red).

Scale bars = 50  $\mu\text{m}$ . (H) Quantification of c-Fos<sup>+</sup> cells as a percent of  $\beta$ -endorphin cells from G, N = 7-8 mice/group, 5 sections/mouse. Two-way ANOVA with post-hoc comparison. \*  $p < 0.05$ , \*\*  $p < 0.01$ , \*\*\*  $p < 0.001$ . All values are mean  $\pm$  SEM.

**Figure S9. Microglial chemogenetic activation increases first-phase insulin release, which is not prevented by sympathetic agonist administration, related to Figure 7.** (A-D) Acute-phase glucose-stimulated insulin secretion in CD-fed control and hM3D mice treated with systemic CNO (5 mg/kg, i.p., 2 hours prior; 2 g/kg glucose, i.p.) at (A-B) 4 min and (C-D) 8 min post-glucose injection, N = 9-11/group. Two-way ANOVA with Šidák correction for multiple comparisons. (E-G) GTT (2 g/kg glucose, i.p.) performed in CD-fed control and hM3D mice 45 min after administration of (E) saline or (F) clonidine (0.01 mg/kg, i.p.) and 20 min after administration of low-dose CNO (0.5 mg/kg, i.p.). (G) AUC quantification of E and F, N = 7-8/group. Two-way ANOVA with Sidak correction for multiple comparisons. \*  $p < 0.05$ , \*\*  $p < 0.01$ , \*\*\*  $p < 0.001$ . All values are mean  $\pm$  SEM.

**Table S1. Genotyping and real-time qPCR primers, related to STAR Methods.**

| REAGENT or RESOURCE                                                                                                     | SOURCE | IDENTIFIER |
|-------------------------------------------------------------------------------------------------------------------------|--------|------------|
| <b>Real-time qPCR Primers</b>                                                                                           |        |            |
| Primers for 18S;<br><i>Forward:</i> CGGACAGGATTGACAGATTG<br><i>Reverse:</i> CAAATCGCTCCAATAA                            |        | N/A        |
| Primers for mouse TNF $\alpha$ ;<br><i>Forward:</i> CATCTTCTCAAACTCGAGTGACAA<br><i>Reverse:</i> TGGGAGTAGATAAGGTACAGCCC |        | N/A        |
| Primers for mouse IL1 $\beta$ ;<br><i>Forward:</i> TACAAGGAGAGACAAGCAACGACA<br><i>Reverse:</i> GATCCACACTCTCCAGCTGCA    |        | N/A        |
| Primers for mouse IL6;<br><i>Forward:</i> GTGGCTAAGGACCAAGACCA<br><i>Reverse:</i> GGTTTGCCGAGTAGACCTCA                  |        | N/A        |

|                                                                                                                                                                                                                                                                    |  |     |
|--------------------------------------------------------------------------------------------------------------------------------------------------------------------------------------------------------------------------------------------------------------------|--|-----|
| Primers for mouse MIP1 $\alpha$ ;<br><i>Forward:</i> CTGCCCTTGCTGTTCTTCTC<br><i>Reverse:</i> GATGAATTGGCGTGGAATCT                                                                                                                                                  |  | N/A |
| Primers for mouse MIP1 $\beta$ ;<br><i>Forward:</i> CTGCCCTCTCTCCTCTTG<br><i>Reverse:</i> AGGAAGTGGGAGGGTCAGAG                                                                                                                                                     |  | N/A |
| Primers for mouse MCP1;<br><i>Forward:</i> CTTCTGGGCCTGCTGTTCA<br><i>Reverse:</i> CAAGCCTACTCATGGGCTTC                                                                                                                                                             |  | N/A |
| Primers for mouse Slc2a1;<br><i>Forward:</i> CCCCGTCCTGCTGCTATTG<br><i>Reverse:</i> GCACCGTGAAGATGATGAAGAC                                                                                                                                                         |  | N/A |
| Primers for mouse UCP2;<br><i>Forward:</i> AAGCAGTTCTACACCAAGGGC<br><i>Reverse:</i> TCTCGTGCAATGGTCTTGTAG                                                                                                                                                          |  | N/A |
| Primers for mouse GCK;<br><i>Forward:</i> CAAGCTGCACCCGAGCTT<br><i>Reverse:</i> TGATTGATGAAGGTGATTTCG                                                                                                                                                              |  | N/A |
| Primers for mouse G6pc;<br><i>Forward:</i> TCAACCTCGTCTTCAAGTGGATT<br><i>Reverse:</i> CTGCTTTATTATAGGCACGGAGCT                                                                                                                                                     |  | N/A |
| Primers for mouse Pck1;<br><i>Forward:</i> GGC GGAGCATATGCTGATCC<br><i>Reverse:</i> CCACAGGCACTAGGGAAGGC                                                                                                                                                           |  | N/A |
| Primers for mouse Gq DREADD;<br><i>Forward:</i> TCTGGCAAGTGGTCTTCATC<br><i>Reverse:</i> TTACCAGGATGTTGCCGATG                                                                                                                                                       |  | N/A |
| <b>Genotyping Primers</b>                                                                                                                                                                                                                                          |  |     |
| Primers for Ikbkb floxed allele;<br><i>Forward:</i> CCTTGTCCCTATAGAAGCACAAC<br><i>Reverse:</i> GTCATTTCCACAGCCCTGTGA                                                                                                                                               |  | N/A |
| Primers for CreER allele;<br><i>Common</i><br><i>Forward:</i> AAGACTCACGTGGACCTGCT <i>Mutant</i><br><i>Reverse:</i> CGGTTATTCAACTTGCACCA<br><i>Wild Type Reverse:</i><br>AGGATGTTGACTTCCGAGTTG                                                                     |  | N/A |
| Primers for hM3D line;<br><i>Transgene</i><br><i>Forward:</i> TCTGGCAAGTGGTCTTCATC<br><i>Transgene</i><br><i>Reverse:</i> TTACCAGGATGTTGCCGATG<br><i>Int. Pos. Ctrl Forward:</i><br>CACGTGGGCTCCAGCATT<br><i>Int. Pos. Ctrl Reverse:</i><br>TCACCAGTCATTTCTGCCTTTG |  | N/A |

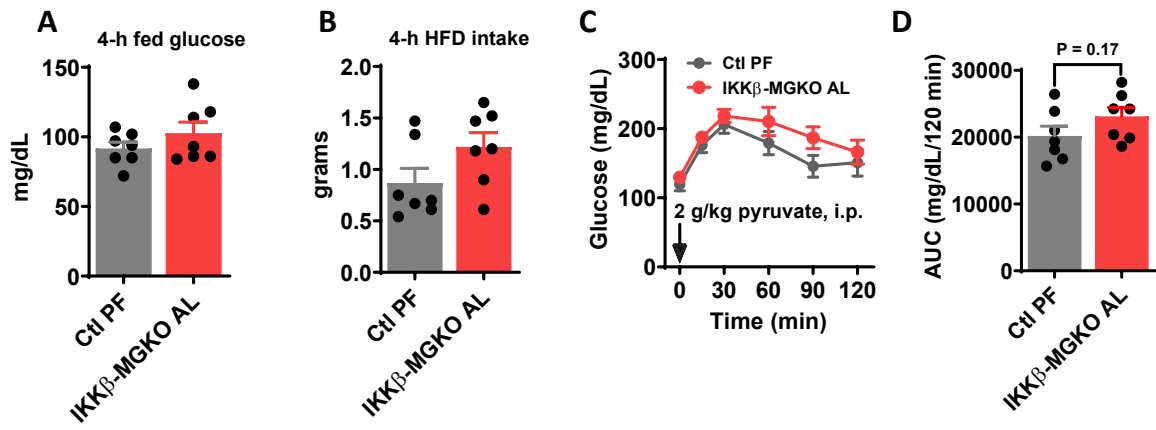

Figure S1

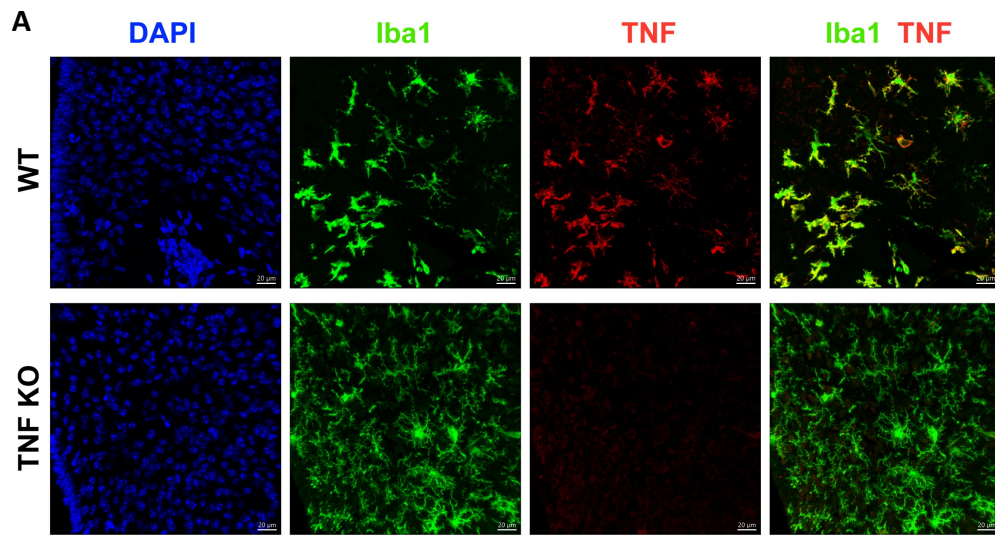

Figure S2

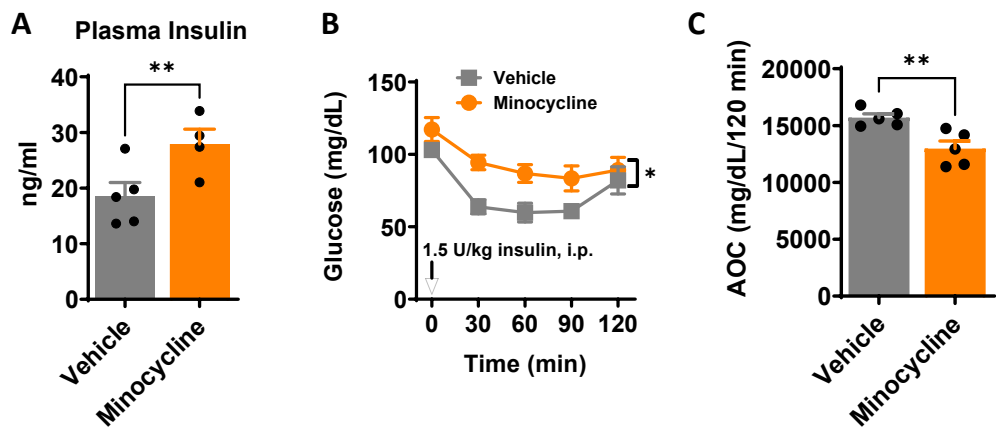

Figure S3



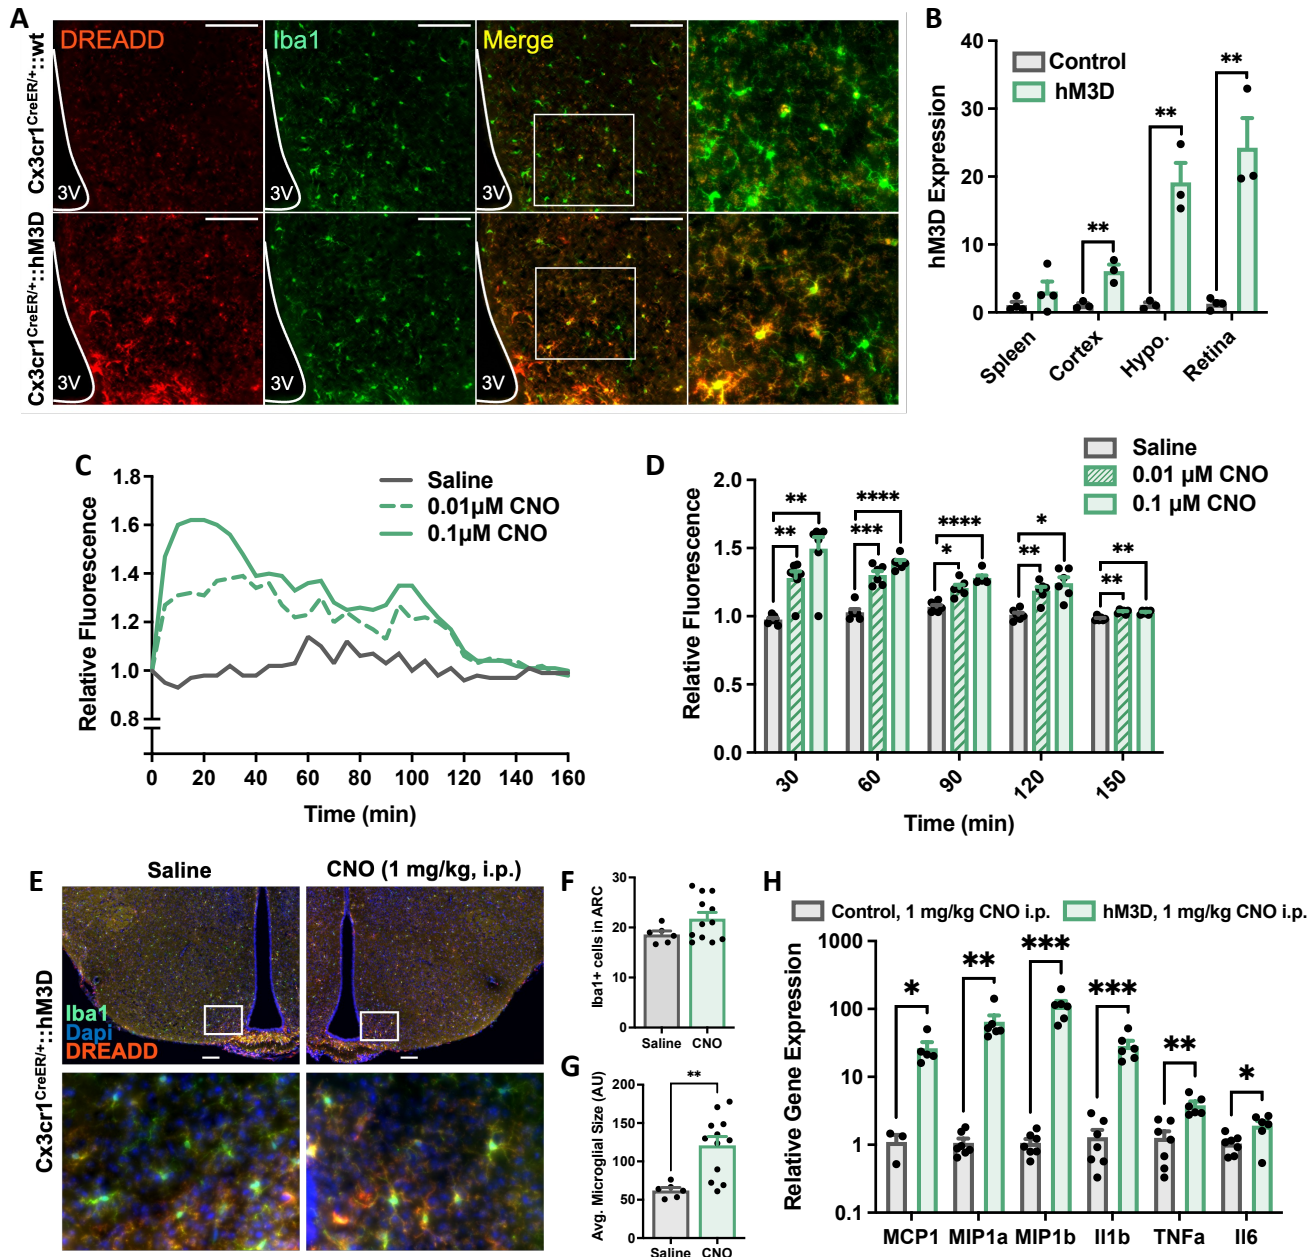

Figure S4

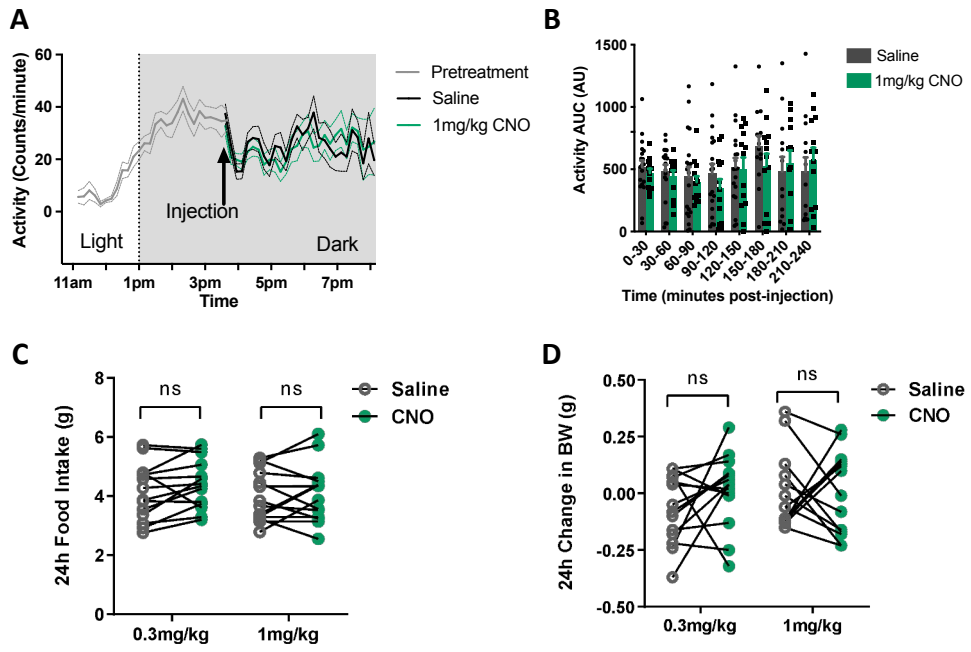

Figure S5

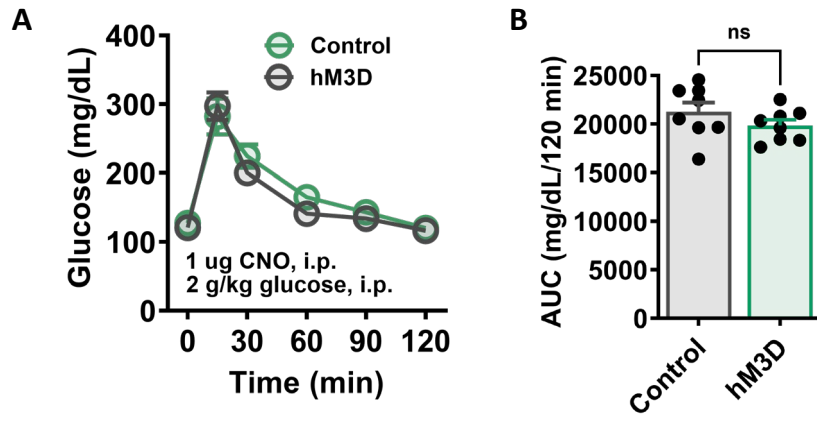

Figure S6

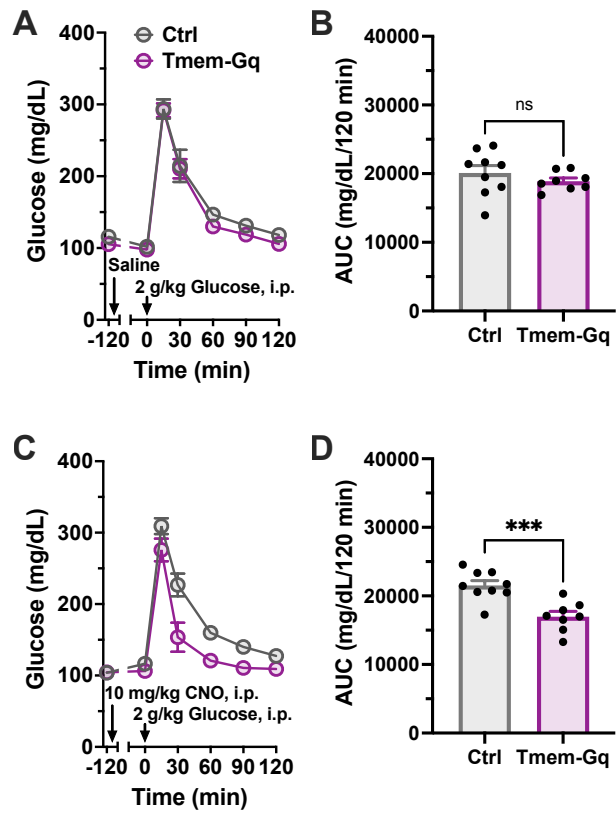

Figure S7

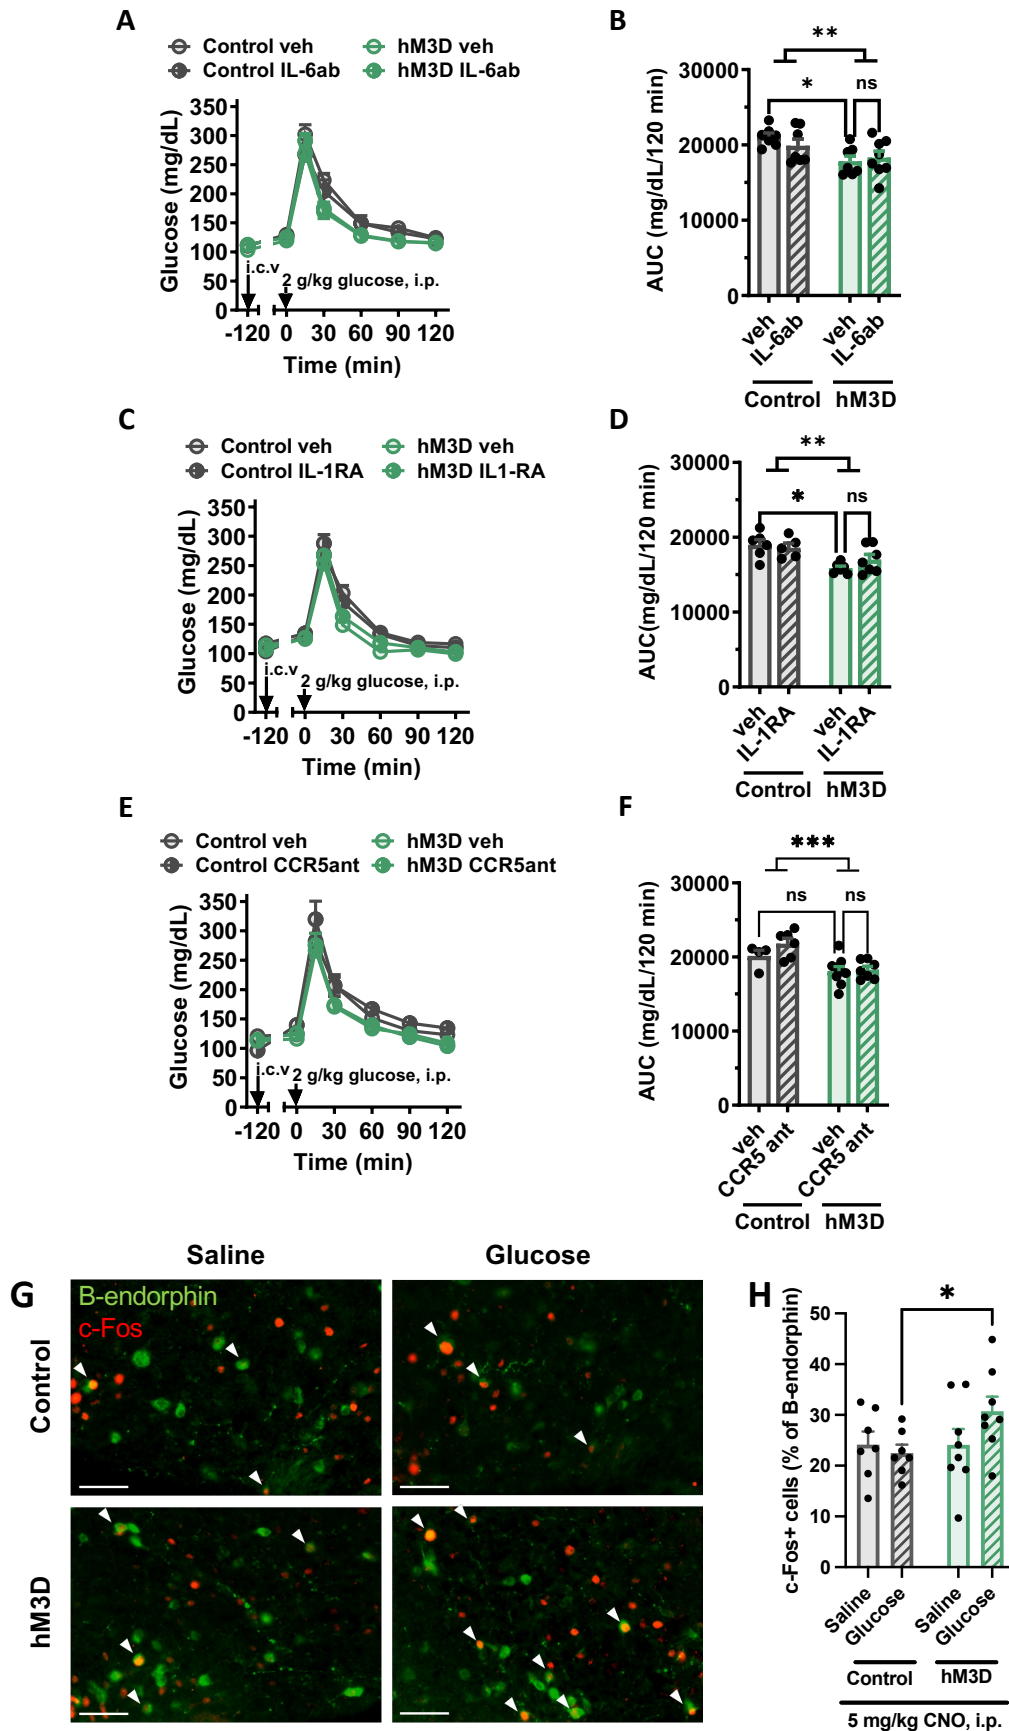

Figure S8

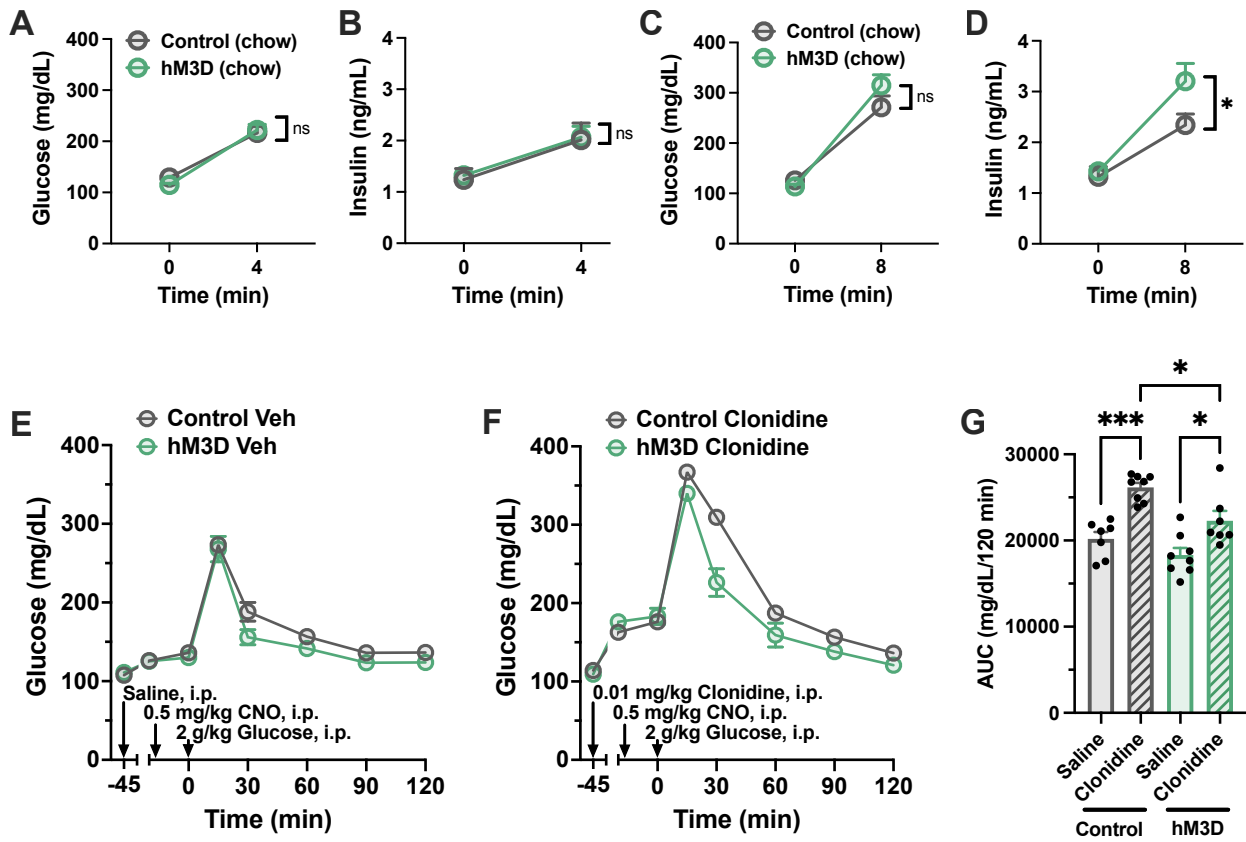

Figure S9
